# Supplementary material
Source: HighWire-hosted journal article supplement (https://sti.bmj.com/content/100/6/371)
Supplement: inline-supplementary-material-1 [file inline-supplementary-material-1.pdf]

## Online Supplementary Material.

### Table of Contents

| Table    | Title                                                                                                                                                                                                                   | Page  |
|----------|-------------------------------------------------------------------------------------------------------------------------------------------------------------------------------------------------------------------------|-------|
|          | Methods – discussion of anthropometric variables                                                                                                                                                                        | 2     |
|          | Results - descriptive analysis corresponding to Table 2                                                                                                                                                                 | 3-4   |
| STable 1 | Sociodemographic, anthropometric, and attitudinal characteristics of male NInJaS respondents, stratified by 10-year age group and lifetime use of sexual services.                                                      | 5-8   |
| STable 2 | Sociodemographic, anthropometric, and attitudinal characteristics associated with lifetime use of sexual services among male NInJaS respondents, stratified by 10-year age group [univariate age-adjusted odds ratios]. | 9-12  |
| STable 3 | Sociodemographic, anthropometric, and attitudinal characteristics associated with lifetime use of sexual services among male NInJaS respondents, stratified by 10-year age group [multivariate odds ratios].            | 13-16 |
| STable 4 | Distribution of the number of estimated CSW partners over the lifetime reported by male NInJaS respondents aged 20-49 years.                                                                                            | 17    |
| STable 5 | Sociodemographic, anthropometric, and attitudinal characteristics of male NInJaS respondents aged 20-49 years, stratified by use of sexual services in the past year.                                                   | 18-20 |
|          | References                                                                                                                                                                                                              | 21    |

**Methods – discussion of anthropometric variables**

Four anthropometric variables were included in the analysis: height, weight, BMI, and self-rated attractiveness. These variables were included in the NInJaS questionnaire as they are considered important “specs” in the Japanese relationship market (though this is likely true in many other countries as well). For example, the Japanese concept of the “three highs” (*sankou*) was very popular during the 1980s Bubble Era: high education, high income, and height.”<sup>1</sup> This was a term used to describe men who were most desirable in the marriage market. Research has since shown that taller men<sup>2</sup> and men with lower BMI<sup>3</sup> are more likely to be married in Japan. Prior research in other countries has shown that objective and self-rated attractiveness is also associated with sexual activity;<sup>4,5</sup> in this study, we use self-rated attractiveness as we did not require photo submission as part of the online survey in an effort to maintain anonymity.

**Results - descriptive analysis corresponding to Table 2**

The average age of all respondents was 36.4 years (standard deviation [SD] 8.6), with those having a history of CSW service use (38.8 years [SD 7.3]) being older than those who have not (34.2 [9.2]). A considerably larger proportion of those who have used CSW services were married (64.0%) compared to those who have not (37.0%). A roughly similar proportion of heterosexual respondents were identified among those who have and have not used CSW services (89.3 vs 85.6%). There were considerably more full-time employees (85.0% vs 60.3%) and fewer part-time employees (3.9% vs 10.0%) among those who have used CSW services. The distribution of income was higher among those who have used CSW services, with 48.2% of respondents having an income above ¥5,000,000 compared to only 23.7% among those who have not. The distribution of education was roughly similar in both groups: 60.9 vs 55.9% had a university education or higher. No striking differences were noted in the distributions of region of residence or urbanity of residence between the two groups.

Both those who have used CSW services and those who have not were similar with respect to height (171.1 [6.2] vs 170.6 [7.6], respectively), weight (67.4 [11.3] vs 65.6 [13.9]), and BMI (22.9 [3.7] vs 21.3 [4.2]). However, more than double the number of respondents who have used CSW services reported that they are above average attractiveness than their counterparts who have not (13.0 vs 5.3%), while considerably fewer reported that they were below average attractiveness (29.7% vs 40.9%).

Both those who have used CSW services and those who have not reported similar proportions of being satisfied with their sex lives (26.2 vs 25.2%, respectively). However, a considerably larger proportion of the former reported that they would like to increase their frequency of sexual intercourse compared to the latter (56.3 vs 29.1%). Similarly, respondents who have used CSW services were much more likely to report that they considered sex to be important compared to those who have not (66.3 vs 38.6%).

**STable 1.** Sociodemographic, anthropometric, and attitudinal characteristics of male NInJaS respondents, stratified by 10-year age group and lifetime use of sexual services.

| Variable                 | Category                     | 20-29 (N = 1333) |               |            | 30-39 (N = 1333) |               |            | 40-49 (N = 1334) |               |            | 20-49 (N = 4000) |                |            |
|--------------------------|------------------------------|------------------|---------------|------------|------------------|---------------|------------|------------------|---------------|------------|------------------|----------------|------------|
|                          | Lifetime Use of CSW Services | No (N = 926)     | Yes (N = 407) | Total      | No (N = 728)     | Yes (N = 605) | Total      | No (N = 567)     | Yes (N = 767) | Total      | No (N = 2221)    | Yes (N = 1779) | Total      |
| <i>SOCIODEMOGRAPHICS</i> |                              |                  |               |            |                  |               |            |                  |               |            |                  |                |            |
| Age                      | Mean (SD)                    | 24.4 (2.8)       | 25.7 (2.6)    | 24.8 (2.8) | 34.5 (3.0)       | 35.2 (2.7)    | 34.9 (2.9) | 44.7 (3.0)       | 45.0 (2.7)    | 44.9 (2.8) | 34.2 (9.2)       | 38.8 (7.3)     | 36.4 (8.6) |
| Marital status           | Married                      | 10.6             | 26.8          | 15.2       | 44.5             | 68.8          | 56.6       | 59.3             | 72.1          | 66.9       | 37.0             | 64.0           | 50.0       |
|                          | Never married                | 85.5             | 67.1          | 80.2       | 52.7             | 27.8          | 40.3       | 38.6             | 23.4          | 29.5       | 60.0             | 31.7           | 46.3       |
|                          | Previously married           | 3.9              | 6.1           | 4.6        | 2.8              | 3.4           | 3.1        | 2.2              | 4.5           | 3.5        | 3.0              | 4.4            | 3.7        |
| Relationship status      | Married                      | 10.6             | 26.8          | 15.2       | 44.5             | 68.8          | 56.6       | 59.3             | 72.1          | 66.9       | 37.0             | 64.0           | 50.0       |
|                          | Cohabiting                   | 1.6              | 7.5           | 3.3        | 2.0              | 2.0           | 2.0        | 0.5              | 0.9           | 0.8        | 1.4              | 2.3            | 1.8        |
|                          | In a relationship            | 11.0             | 15.7          | 12.3       | 5.8              | 4.8           | 5.3        | 3.9              | 4.3           | 4.1        | 7.0              | 6.2            | 6.7        |
|                          | Not in a relationship        | 76.8             | 50.0          | 69.2       | 47.8             | 24.4          | 36.2       | 36.4             | 22.7          | 28.2       | 54.6             | 27.5           | 41.5       |
| Sexual orientation       | Heterosexual                 | 80.5             | 80.1          | 80.4       | 86.1             | 88.8          | 87.4       | 90.9             | 92.3          | 91.7       | 85.6             | 89.3           | 87.4       |
|                          | Bisexual                     | 3.1              | 10.3          | 5.2        | 2.2              | 4.5           | 3.4        | 1.6              | 2.7           | 2.2        | 2.3              | 4.5            | 3.4        |
|                          | Homosexual                   | 2.6              | 3.8           | 2.9        | 2.6              | 1.5           | 2.1        | 2.2              | 0.9           | 1.4        | 2.5              | 1.5            | 2.0        |
|                          | Asexual                      | 13.3             | 5.8           | 11.2       | 8.2              | 5.0           | 6.6        | 5.0              | 4.1           | 4.5        | 9.0              | 4.7            | 6.9        |
|                          | Other                        | 0.5              | 0.0           | 0.4        | 0.9              | 0.2           | 0.6        | 0.4              | 0.0           | 0.2        | 0.6              | 0.1            | 0.3        |
| Occupational status      | Full-time                    | 44.6             | 74.4          | 53.1       | 65.7             | 88.2          | 76.9       | 72.7             | 86.2          | 80.8       | 60.3             | 85.0           | 72.3       |
|                          | Part-time                    | 12.4             | 7.5           | 11.0       | 11.4             | 3.8           | 7.6        | 6.1              | 2.9           | 4.2        | 10.0             | 3.9            | 7.1        |
|                          | Self-employed                | 2.0              | 5.8           | 3.1        | 7.6              | 4.1           | 5.9        | 10.4             | 7.6           | 8.7        | 6.5              | 6.2            | 6.3        |
|                          | Student                      | 23.7             | 9.3           | 19.6       | 0.1              | 0.0           | 0.1        | 0.0              | 0.0           | 0.0        | 8.7              | 1.5            | 5.2        |
|                          | Housewife/husband            | 0.2              | 0.7           | 0.3        | 1.9              | 0.2           | 1.0        | 1.3              | 0.4           | 0.8        | 1.1              | 0.4            | 0.7        |

|                       |                                                              |      |      |      |      |      |      |      |      |      |      |      |      |
|-----------------------|--------------------------------------------------------------|------|------|------|------|------|------|------|------|------|------|------|------|
|                       | Unemployed                                                   | 17.1 | 2.4  | 12.9 | 13.4 | 3.7  | 8.6  | 9.5  | 2.9  | 5.6  | 13.5 | 3.1  | 8.4  |
| Income                | <100                                                         | 44.8 | 12.6 | 35.6 | 17.4 | 4.1  | 10.8 | 12.8 | 4.3  | 7.7  | 25.8 | 5.5  | 16.0 |
| in ¥10,000s           | 100-299                                                      | 25.9 | 26.6 | 26.1 | 24.1 | 9.3  | 16.7 | 19.0 | 7.4  | 12.1 | 23.0 | 11.0 | 17.2 |
|                       | 300-499                                                      | 20.6 | 45.6 | 27.7 | 33.9 | 36.6 | 35.2 | 29.0 | 31.4 | 30.4 | 27.4 | 35.3 | 31.2 |
|                       | 500-799                                                      | 6.7  | 13.1 | 8.5  | 19.9 | 39.6 | 29.7 | 23.9 | 38.1 | 32.4 | 16.4 | 34.7 | 25.2 |
|                       | >800                                                         | 2.2  | 2.2  | 2.2  | 4.8  | 10.4 | 7.6  | 15.3 | 18.8 | 17.4 | 7.3  | 13.5 | 10.3 |
| Education             | High school or less                                          | 32.0 | 27.1 | 30.6 | 30.2 | 24.7 | 27.4 | 26.3 | 23.8 | 24.8 | 29.6 | 24.6 | 27.2 |
|                       | Trade/vocational school or short college                     | 10.1 | 14.1 | 11.2 | 16.8 | 14.1 | 15.5 | 17.4 | 14.9 | 15.9 | 14.6 | 14.5 | 14.5 |
|                       | Undergraduate studies                                        | 51.9 | 52.9 | 52.2 | 47.1 | 53.8 | 50.4 | 41.4 | 51.3 | 47.3 | 47.0 | 52.4 | 49.6 |
|                       | Graduate studies                                             | 6.1  | 5.9  | 6.0  | 5.9  | 7.5  | 6.7  | 14.9 | 9.9  | 12.0 | 8.9  | 8.5  | 8.7  |
| Region of residence   | Hokkaido & Tohoku                                            | 10.0 | 10.4 | 10.1 | 9.4  | 12.1 | 10.7 | 12.0 | 9.8  | 10.7 | 10.5 | 10.6 | 10.5 |
|                       | Kanto                                                        | 36.1 | 39.4 | 37.1 | 35.7 | 36.8 | 36.3 | 37.3 | 35.5 | 36.2 | 36.4 | 36.5 | 36.5 |
|                       | Chubu                                                        | 17.1 | 17.1 | 17.1 | 18.4 | 15.9 | 17.2 | 16.7 | 17.7 | 17.3 | 17.3 | 17.0 | 17.2 |
|                       | Kansai                                                       | 18.2 | 15.8 | 17.5 | 16.0 | 17.2 | 16.6 | 17.5 | 16.8 | 17.1 | 17.3 | 16.8 | 17.0 |
|                       | Chugoku & Shikoku                                            | 8.4  | 6.8  | 7.9  | 9.5  | 7.0  | 8.3  | 9.4  | 7.8  | 8.4  | 9.1  | 7.4  | 8.2  |
|                       | Kyushu & Okinawa                                             | 10.2 | 10.5 | 10.3 | 11.0 | 11.1 | 11.1 | 7.2  | 12.6 | 10.4 | 9.4  | 11.8 | 10.6 |
| Urbanity of residence | Within Tokyo's 23 wards or prefectural capital               | 31.6 | 32.7 | 31.9 | 27.9 | 32.3 | 30.1 | 31.4 | 31.5 | 31.4 | 30.4 | 31.9 | 31.1 |
|                       | In Tokyo but outside of the 23 wards                         | 4.4  | 3.1  | 4.0  | 5.5  | 5.2  | 5.4  | 5.0  | 3.8  | 4.3  | 4.9  | 4.2  | 4.6  |
|                       | Cities other than prefectural capitals (population >500,000) | 13.4 | 16.5 | 14.3 | 13.2 | 13.4 | 13.3 | 12.5 | 12.9 | 12.7 | 13.0 | 13.6 | 13.3 |
|                       | Cities other than prefectural capitals                       | 12.9 | 14.3 | 13.3 | 12.0 | 12.6 | 12.3 | 9.1  | 12.2 | 11.0 | 11.4 | 12.7 | 12.0 |

|                                                                |                                                              |                    |                    |                    |                    |                    |                    |                    |                    |                    |                    |                    |                    |
|----------------------------------------------------------------|--------------------------------------------------------------|--------------------|--------------------|--------------------|--------------------|--------------------|--------------------|--------------------|--------------------|--------------------|--------------------|--------------------|--------------------|
|                                                                | (population 300,000-499,999)                                 |                    |                    |                    |                    |                    |                    |                    |                    |                    |                    |                    |                    |
|                                                                | Cities other than prefectural capitals (population <300,000) | 27.1               | 22.3               | 25.7               | 28.9               | 26.8               | 27.9               | 33.4               | 30.6               | 31.8               | 29.7               | 28.1               | 28.9               |
|                                                                | Village or town                                              | 10.7               | 11.2               | 10.8               | 12.6               | 9.6                | 11.1               | 8.5                | 9.0                | 8.8                | 10.5               | 9.6                | 10.1               |
| <b>ANTHROPOMETRICS</b>                                         |                                                              |                    |                    |                    |                    |                    |                    |                    |                    |                    |                    |                    |                    |
| Height                                                         | Mean (SD)                                                    | 170.4<br>(7.3)     | 170.3<br>(8.2)     | 170.3<br>(7.6)     | 170.2<br>(7.3)     | 171.1<br>(6.1)     | 170.7<br>(6.8)     | 171.1<br>(7.7)     | 171.4<br>(5.9)     | 171.3<br>(6.6)     | 170.6<br>(7.6)     | 171.1<br>(6.2)     | 170.8<br>(6.9)     |
| Weight                                                         | Mean (SD)                                                    | 63.3<br>(13.6<br>) | 63.8<br>(11.6<br>) | 63.4<br>(13.1<br>) | 65.2<br>(12.5<br>) | 66.4<br>(11.1<br>) | 65.8<br>(11.8<br>) | 68.4<br>(13.9<br>) | 69.2<br>(11.4<br>) | 68.9<br>(12.4<br>) | 65.6<br>(13.9<br>) | 67.4<br>(11.3<br>) | 66.4<br>(12.6<br>) |
| BMI                                                            | Mean (SD)                                                    | 21.8<br>(5.0)      | 21.9<br>(3.5)      | 21.8<br>(4.7)      | 22.5<br>(4.2)      | 22.6<br>(3.5)      | 22.6<br>(3.8)      | 23.4<br>(5.1)      | 23.6<br>(3.7)      | 23.5<br>(4.3)      | 21.3<br>(4.2)      | 22.9<br>(3.7)      | 21.7<br>(4.1)      |
| How would you describe your attractiveness?                    | Above average                                                | 6.9                | 17.1               | 9.8                | 4.2                | 13.0               | 8.6                | 4.6                | 11.8               | 8.9                | 5.3                | 13.0               | 9.0                |
|                                                                | About average                                                | 51.2               | 59.0               | 53.4               | 54.2               | 57.7               | 55.9               | 56.2               | 56.4               | 56.3               | 53.8               | 57.2               | 55.4               |
|                                                                | Below average                                                | 41.9               | 24.0               | 36.8               | 41.6               | 29.3               | 35.5               | 39.3               | 31.7               | 34.8               | 40.9               | 29.7               | 35.5               |
| <b>ATTITUDES</b>                                               |                                                              |                    |                    |                    |                    |                    |                    |                    |                    |                    |                    |                    |                    |
| "I am satisfied with my sex life."                             | Strongly agree                                               | 5.3                | 10.7               | 6.8                | 3.5                | 6.7                | 5.1                | 3.6                | 2.7                | 3.0                | 5.9                | 5.5                | 5.8                |
|                                                                | Agree                                                        | 17.4               | 28.9               | 20.7               | 17.1               | 22.8               | 20.0               | 14.6               | 16.8               | 15.9               | 19.3               | 20.7               | 19.7               |
|                                                                | Neutral                                                      | 54.8               | 33.9               | 48.8               | 54.0               | 41.6               | 47.8               | 57.2               | 48.2               | 51.8               | 55.2               | 43.7               | 52.2               |
|                                                                | Disagree                                                     | 11.7               | 17.6               | 13.4               | 13.0               | 16.5               | 14.7               | 12.3               | 18.2               | 15.8               | 10.8               | 17.5               | 12.6               |
|                                                                | Strongly disagree                                            | 10.8               | 8.8                | 10.2               | 12.4               | 12.5               | 12.5               | 12.4               | 14.0               | 13.4               | 8.8                | 12.6               | 9.8                |
| Would you like to change your frequency of sexual intercourse? | Yes, I would like to increase it a lot                       | 12.1               | 26.1               | 16.1               | 11.7               | 22.8               | 17.2               | 11.9               | 24.0               | 19.2               | 7.4                | 23.6               | 11.7               |

|                              |                                           |      |      |      |      |      |      |      |      |      |      |      |      |
|------------------------------|-------------------------------------------|------|------|------|------|------|------|------|------|------|------|------|------|
|                              | Yes, I would like to increase it a little | 23.7 | 34.0 | 26.6 | 25.6 | 31.2 | 28.4 | 23.0 | 34.9 | 30.1 | 21.7 | 32.7 | 24.6 |
|                              | No                                        | 54.1 | 35.5 | 48.8 | 53.4 | 41.9 | 47.7 | 60.2 | 38.5 | 47.3 | 59.8 | 38.5 | 54.2 |
|                              | Yes, I would like to decrease It a little | 2.6  | 2.1  | 2.4  | 1.8  | 2.8  | 2.3  | 1.2  | 0.8  | 1.0  | 2.9  | 3.0  | 2.9  |
|                              | Yes, I would like to decrease it a lot    | 7.6  | 2.2  | 6.1  | 7.5  | 1.4  | 4.5  | 3.6  | 1.7  | 2.5  | 8.2  | 2.2  | 6.7  |
| How important is sex to you? | Very important                            | 11.7 | 27.2 | 16.1 | 12.4 | 25.2 | 18.8 | 13.5 | 23.6 | 19.5 | 9.9  | 24.2 | 13.7 |
|                              | Somewhat important                        | 25.3 | 42.1 | 30.1 | 31.5 | 43.3 | 37.4 | 30.9 | 43.4 | 38.3 | 28.6 | 42.1 | 32.2 |
|                              | Neither important nor unimportant         | 38.9 | 21.5 | 33.9 | 34.3 | 22.2 | 28.3 | 34.9 | 23.5 | 28.1 | 31.6 | 22.7 | 29.3 |
|                              | Not very important                        | 9.7  | 7.0  | 8.9  | 9.3  | 6.7  | 8.0  | 14.2 | 6.2  | 9.4  | 14.8 | 7.6  | 12.9 |
|                              | Not important at all                      | 14.4 | 2.3  | 11.0 | 12.4 | 2.6  | 7.5  | 6.6  | 3.4  | 4.7  | 15.1 | 3.5  | 12.1 |



**STable 2.** Sociodemographic, anthropometric, and attitudinal characteristics associated with lifetime use of sexual services among male NiJaS respondents, stratified by 10-year age group [univariate age-adjusted odds ratios].

| Variable            | Category              | aOR (95% CI)      |         |                   |         |                   |         |                   |         |
|---------------------|-----------------------|-------------------|---------|-------------------|---------|-------------------|---------|-------------------|---------|
|                     |                       | 20-29 (N = 1333)  | p value | 30-39 (N = 1333)  | p value | 40-49 (N = 1334)  | p value | 20-49 (N = 4000)  | p value |
| SOCIODEMOGRAPHICS   |                       |                   |         |                   |         |                   |         |                   |         |
| Age                 |                       | 1.18 (1.13-1.24)* | <0.001  | 1.09 (1.04-1.13)* | <0.001  | 1.03 (0.99-1.08)  | 0.14    | 1.07 (1.06-1.08)* | <0.001  |
| Marital status      | Married               | Ref.              |         | Ref.              |         | Ref.              |         | Ref.              |         |
|                     | Never married         | 0.42 (0.30-0.60)* | <0.001  | 0.36 (0.28-0.45)* | <0.001  | 0.50 (0.40-0.64)* | <0.001  | 0.42 (0.36-0.48)* | <0.001  |
|                     | Previously married    | 0.82 (0.45-1.51)  | 0.532   | 0.79 (0.45-1.37)  | 0.403   | 1.65 (0.94-2.88)  | 0.082   | 1.01 (0.74-1.38)  | 0.943   |
| Relationship status | Married               | Ref.              |         | Ref.              |         | Ref.              |         | Ref.              |         |
|                     | Cohabiting            | 2.62 (1.27-5.42)* | 0.01    | 0.71 (0.36-1.42)  | 0.336   | 1.51 (0.40-5.60)  | 0.541   | 1.52 (0.95-2.43)  | 0.082   |
|                     | In a relationship     | 0.87 (0.54-1.41)  | 0.577   | 0.58 (0.37-0.91)* | 0.017   | 0.93 (0.57-1.52)  | 0.769   | 0.76 (0.58-0.98)* | 0.037   |
|                     | Not in a relationship | 0.35 (0.25-0.51)* | <0.001  | 0.34 (0.27-0.44)* | <0.001  | 0.51 (0.41-0.65)* | <0.001  | 0.39 (0.34-0.46)* | <0.001  |
| Sexual orientation  | Heterosexual          | Ref.              |         | Ref.              |         | Ref.              |         | Ref.              |         |
|                     | Bisexual              | 3.66 (2.11-6.34)* | <0.001  | 2.02 (1.07-3.83)* | 0.031   | 1.71 (0.71-4.08)  | 0.229   | 2.42 (1.63-3.60)* | <0.001  |
|                     | Homosexual            | 1.97 (0.95-4.06)  | 0.067   | 0.67 (0.28-1.57)  | 0.355   | 0.38 (0.17-0.86)* | 0.02    | 0.74 (0.44-1.23)  | 0.249   |
|                     | Asexual               | 0.46 (0.28-0.75)* | 0.002   | 0.60 (0.37-0.98)* | 0.041   | 0.81 (0.47-1.41)  | 0.463   | 0.61 (0.45-0.81)* | 0.001   |
|                     | Other                 | -                 |         | 0.23 (0.05-1.12)  | 0.068   | -                 |         | 0.13 (0.03-0.58)* | 0.008   |
| Occupational status | Full-time             | Ref.              |         | Ref.              |         | Ref.              |         | Ref.              |         |
|                     | Part-time             | 0.39 (0.25-0.61)* | <0.001  | 0.25 (0.16-0.38)* | <0.001  | 0.39 (0.24-0.66)* | <0.001  | 0.33 (0.25-0.43)* | <0.001  |
|                     | Self-employed         | 1.80 (0.90-3.58)  | 0.095   | 0.39 (0.24-0.63)* | <0.001  | 0.62 (0.41-0.92)* | 0.018   | 0.61 (0.46-0.82)* | 0.001   |

|                       |                                                |                   |        |                    |        |                   |        |                   |        |
|-----------------------|------------------------------------------------|-------------------|--------|--------------------|--------|-------------------|--------|-------------------|--------|
|                       | Student                                        | 0.37 (0.22-0.62)* | <0.001 | -                  |        | -                 |        | 0.26 (0.17-0.41)* | <0.001 |
|                       | Housewife/husband                              | 2.71 (0.34-21.81) | 0.349  | 0.07 (0.01-0.52)*  | 0.01   | 0.25 (0.04-1.41)  | 0.115  | 0.23 (0.08-0.69)* | 0.009  |
|                       | Unemployed                                     | 0.09 (0.04-0.17)* | <0.001 | 0.20 (0.13-0.31)*  | <0.001 | 0.26 (0.17-0.41)* | <0.001 | 0.19 (0.14-0.25)* | <0.001 |
| Income                | <100                                           | Ref.              |        | Ref.               |        | Ref.              |        | Ref.              |        |
| in ¥10,000s           | 100-299                                        | 3.34 (2.21-5.06)* | <0.001 | 1.62 (1.01-2.61)*  | 0.048  | 1.16 (0.71-1.91)  | 0.549  | 1.98 (1.52-2.58)* | <0.001 |
|                       | 300-499                                        | 6.56 (4.40-9.78)* | <0.001 | 4.63 (3.02-7.09)*  | <0.001 | 3.23 (2.06-5.05)* | <0.001 | 4.84 (3.80-6.18)* | <0.001 |
|                       | 500-799                                        | 5.73 (3.43-9.57)* | <0.001 | 8.03 (5.16-12.51)* | <0.001 | 4.75 (3.01-7.49)* | <0.001 | 7.14 (5.47-9.31)* | <0.001 |
|                       | >800                                           | 3.08 (1.22-7.78)* | 0.018  | 8.46 (4.68-15.32)* | <0.001 | 3.65 (2.22-5.99)* | <0.001 | 5.72 (4.11-7.97)* | <0.001 |
| Education             | High school or less                            | Ref.              |        | Ref.               |        | Ref.              |        | Ref.              |        |
|                       | Trade/vocational school or short college       | 1.54 (1.00-2.37)  | 0.05   | 1.03 (0.70-1.52)   | 0.88   | 0.95 (0.66-1.37)  | 0.798  | 1.08 (0.86-1.37)  | 0.497  |
|                       | Undergraduate studies                          | 1.23 (0.91-1.65)  | 0.18   | 1.48 (1.12-1.96)*  | 0.006  | 1.38 (1.03-1.84)* | 0.031  | 1.36 (1.15-1.61)* | <0.001 |
|                       | Graduate studies                               | 1.02 (0.58-1.82)  | 0.935  | 1.66 (1.00-2.77)   | 0.052  | 0.75 (0.49-1.14)  | 0.177  | 0.97 (0.72-1.30)  | 0.818  |
| Region of residence   | Hokkaido & Tohoku                              | Ref.              |        | Ref.               |        | Ref.              |        | Ref.              |        |
|                       | Kanto                                          | 1.08 (0.69-1.67)  | 0.746  | 0.81 (0.55-1.19)   | 0.276  | 1.16 (0.78-1.73)  | 0.461  | 1.01 (0.79-1.29)  | 0.957  |
|                       | Chubu                                          | 0.96 (0.58-1.58)  | 0.869  | 0.68 (0.43-1.06)   | 0.087  | 1.30 (0.83-2.06)  | 0.254  | 0.98 (0.74-1.29)  | 0.873  |
|                       | Kansai                                         | 0.84 (0.51-1.37)  | 0.475  | 0.87 (0.56-1.35)   | 0.522  | 1.17 (0.75-1.84)  | 0.487  | 0.98 (0.74-1.28)  | 0.863  |
|                       | Chugoku & Shikoku                              | 0.80 (0.44-1.45)  | 0.466  | 0.57 (0.32-1.02)   | 0.057  | 1.01 (0.59-1.75)  | 0.966  | 0.79 (0.56-1.11)  | 0.177  |
|                       | Kyushu & Okinawa                               | 0.99 (0.55-1.79)  | 0.982  | 0.78 (0.45-1.34)   | 0.365  | 2.16 (1.18-3.93)* | 0.012  | 1.26 (0.90-1.76)  | 0.174  |
| Urbanity of residence | Within Tokyo's 23 wards or prefectural capital | Ref.              |        | Ref.               |        | Ref.              |        | Ref.              |        |
|                       | In Tokyo but outside of the 23 wards           | 0.60 (0.29-1.24)  | 0.169  | 0.81 (0.47-1.40)   | 0.447  | 0.75 (0.43-1.31)  | 0.314  | 0.77 (0.55-1.09)  | 0.141  |

|                                                                |                                                                     |                   |        |                   |        |                   |        |                   |        |
|----------------------------------------------------------------|---------------------------------------------------------------------|-------------------|--------|-------------------|--------|-------------------|--------|-------------------|--------|
|                                                                | Cities other than prefectural capitals (population >500,000)        | 1.10 (0.74-1.62)  | 0.642  | 0.90 (0.61-1.33)  | 0.602  | 1.04 (0.70-1.54)  | 0.844  | 1.03 (0.81-1.30)  | 0.819  |
|                                                                | Cities other than prefectural capitals (population 300,000-499,999) | 1.00 (0.66-1.52)  | 0.994  | 0.93 (0.62-1.40)  | 0.738  | 1.33 (0.87-2.06)  | 0.19   | 1.11 (0.87-1.41)  | 0.397  |
|                                                                | Cities other than prefectural capitals (population <300,000)        | 0.71 (0.50-1.01)  | 0.054  | 0.78 (0.57-1.06)  | 0.115  | 0.91 (0.68-1.23)  | 0.547  | 0.83 (0.69-1.01)  | 0.057  |
|                                                                | Village or town                                                     | 0.91 (0.58-1.43)  | 0.684  | 0.66 (0.43-1.02)  | 0.059  | 1.05 (0.66-1.67)  | 0.844  | 0.88 (0.68-1.15)  | 0.342  |
| ANTHROPOMETRICS                                                |                                                                     |                   |        |                   |        |                   |        |                   |        |
| Height                                                         |                                                                     | 1.00 (0.98-1.02)  | 0.909  | 1.02 (1.00-1.04)* | 0.03   | 1.01 (0.99-1.02)  | 0.453  | 1.01 (1.00-1.02)  | 0.112  |
| Weight                                                         |                                                                     | 1.00 (0.99-1.01)  | 0.995  | 1.01 (1.00-1.02)  | 0.101  | 1.01 (1.00-1.01)  | 0.316  | 1.00 (1.00-1.01)  | 0.11   |
| BMI                                                            |                                                                     | 1.00 (0.98-1.02)  | 0.893  | 1.01 (0.98-1.04)  | 0.598  | 1.01 (0.98-1.04)  | 0.589  | 1.01 (0.99-1.02)  | 0.523  |
| How would you describe your attractiveness?                    | Above average                                                       | Ref.              |        | Ref.              |        | Ref.              |        | Ref.              |        |
|                                                                | About average                                                       | 0.48 (0.32-0.72)* | <0.001 | 0.33 (0.21-0.53)* | <0.001 | 0.38 (0.23-0.63)* | <0.001 | 0.39 (0.30-0.51)* | <0.001 |
|                                                                | Below average                                                       | 0.24 (0.15-0.37)* | <0.001 | 0.22 (0.14-0.36)* | <0.001 | 0.30 (0.18-0.51)* | <0.001 | 0.26 (0.20-0.35)* | <0.001 |
| ATTITUDES                                                      |                                                                     |                   |        |                   |        |                   |        |                   |        |
| "I am satisfied with my sex life."                             | Strongly agree                                                      | 3.49 (2.12-5.76)* | <0.001 | 2.78 (1.50-5.14)* | 0.001  | 0.91 (0.43-1.92)  | 0.809  | 2.11 (1.46-3.05)* | <0.001 |
|                                                                | Agree                                                               | 2.71 (1.94-3.79)* | <0.001 | 1.77 (1.27-2.47)* | 0.001  | 1.38 (0.98-1.95)  | 0.068  | 1.80 (1.47-2.20)* | <0.001 |
|                                                                | Neutral                                                             | Ref.              |        | Ref.              |        | Ref.              |        | Ref.              |        |
|                                                                | Disagree                                                            | 2.30 (1.57-3.37)* | <0.001 | 1.60 (1.12-2.28)* | 0.009  | 1.76 (1.25-2.50)* | 0.001  | 1.82 (1.48-2.25)* | <0.001 |
|                                                                | Strongly disagree                                                   | 1.30 (0.82-2.05)  | 0.264  | 1.33 (0.92-1.92)  | 0.129  | 1.34 (0.94-1.90)  | 0.107  | 1.33 (1.07-1.67)* | 0.011  |
| Would you like to change your frequency of sexual intercourse? | Yes, I would like to increase it a lot                              | 3.66 (2.56-5.22)* | <0.001 | 2.46 (1.77-3.42)* | <0.001 | 3.13 (2.23-4.40)* | <0.001 | 2.94 (2.41-3.60)* | <0.001 |

|                              |                                           |                   |        |                   |        |                   |        |                   |        |
|------------------------------|-------------------------------------------|-------------------|--------|-------------------|--------|-------------------|--------|-------------------|--------|
|                              | Yes, I would like to increase it a little | 2.38 (1.73-3.26)* | <0.001 | 1.51 (1.13-2.01)* | 0.006  | 2.39 (1.79-3.18)* | <0.001 | 2.02 (1.70-2.41)* | <0.001 |
|                              | No                                        | Ref.              |        | Ref.              |        | Ref.              |        | Ref.              |        |
|                              | Yes, I would like to decrease it a little | 1.42 (0.61-3.34)  | 0.417  | 2.07 (0.83-5.18)  | 0.118  | 1.08 (0.37-3.18)  | 0.886  | 1.60 (0.92-2.77)  | 0.094  |
|                              | Yes, I would like to decrease it a lot    | 0.46 (0.22-0.97)* | 0.042  | 0.25 (0.12-0.54)* | <0.001 | 0.74 (0.32-1.68)  | 0.47   | 0.45 (0.29-0.72)* | 0.001  |
| How important is sex to you? | Very important                            | 4.37 (2.98-6.40)* | <0.001 | 3.09 (2.14-4.47)* | <0.001 | 2.62 (1.82-3.77)* | <0.001 | 3.12 (2.51-3.89)* | <0.001 |
|                              | Somewhat important                        | 3.03 (2.17-4.23)* | <0.001 | 2.09 (1.54-2.84)* | <0.001 | 2.11 (1.56-2.84)* | <0.001 | 2.29 (1.91-2.75)* | <0.001 |
|                              | Neither important nor unimportant         | Ref.              |        | Ref.              |        | Ref.              |        | Ref.              |        |
|                              | Not very important                        | 1.30 (0.75-2.24)  | 0.346  | 1.09 (0.68-1.75)  | 0.725  | 0.65 (0.42-1.00)  | 0.052  | 0.88 (0.66-1.17)  | 0.377  |
|                              | Not important at all                      | 0.30 (0.13-0.68)* | 0.004  | 0.34 (0.18-0.62)* | 0.001  | 0.77 (0.43-1.39)  | 0.388  | 0.48 (0.33-0.68)* | <0.001 |

\* p&lt;0.05

- unable to calculate

**Table 3.** Sociodemographic, anthropometric, and attitudinal characteristics associated with lifetime use of sexual services among male NiJaS

respondents, stratified by 10-year age group [multivariate odds ratios].

| Variable            | Category              | OR (95% CI)       |         |                   |         |                   |         |                   |         |
|---------------------|-----------------------|-------------------|---------|-------------------|---------|-------------------|---------|-------------------|---------|
|                     |                       | 20-29 (N = 1333)  | p value | 30-39 (N = 1333)  | p value | 40-49 (N = 1334)  | p value | 20-49 (N = 4000)  | p value |
| SOCIODEMOGRAPHICS   |                       |                   |         |                   |         |                   |         |                   |         |
| Age                 |                       | 1.12 (1.04-1.20)* | 0.001   | 1.06 (1.01-1.12)* | 0.013   | 1.02 (0.98-1.07)  | 0.315   | 1.04 (1.03-1.05)* | <0.001  |
| Marital status      | Married               | Ref.              |         | Ref.              |         | Ref.              |         | Ref.              |         |
|                     | Never married         | 0.65 (0.42-1.03)  | 0.065   | 0.68 (0.49-0.94)* | 0.021   | 0.89 (0.65-1.21)  | 0.45    | 0.74 (0.61-0.90)* | 0.003   |
|                     | Previously married    | 1.33 (0.63-2.83)  | 0.451   | 1.64 (0.76-3.52)  | 0.208   | 2.15 (1.12-4.10)* | 0.021   | 1.60 (1.10-2.33)* | 0.014   |
| Relationship status | Married               | Ref.              |         | Ref.              |         | Ref.              |         | Ref.              |         |
|                     | Cohabiting            | 4.74 (2.27-9.87)* | <0.001  | 1.00 (0.44-2.28)  | 1       | 1.90 (0.33-10.89) | 0.469   | 2.14 (1.26-3.66)* | 0.005   |
|                     | In a relationship     | 1.37 (0.85-2.22)  | 0.192   | 0.88 (0.51-1.53)  | 0.654   | 1.36 (0.76-2.42)  | 0.301   | 1.24 (0.92-1.67)  | 0.151   |
|                     | Not in a relationship | -                 |         | -                 |         | -                 |         | -                 |         |
| Sexual orientation  | Heterosexual          | Ref.              |         | Ref.              |         | Ref.              |         | Ref.              |         |
|                     | Bisexual              | 3.89 (2.08-7.25)* | <0.001  | 2.62 (1.28-5.35)* | 0.008   | 1.60 (0.56-4.52)  | 0.378   | 2.46 (1.55-3.90)* | <0.001  |
|                     | Homosexual            | 1.77 (0.70-4.48)  | 0.227   | 0.81 (0.36-1.82)  | 0.609   | 0.32 (0.13-0.77)* | 0.011   | 0.76 (0.46-1.28)  | 0.309   |
|                     | Asexual               | 0.97 (0.52-1.80)  | 0.925   | 1.43 (0.79-2.57)  | 0.234   | 1.31 (0.70-2.46)  | 0.397   | 1.20 (0.86-1.69)  | 0.286   |
|                     | Other                 | -                 |         | 1.54 (0.30-7.95)  | 0.605   | -                 |         | 0.64 (0.14-2.95)  | 0.568   |
| Occupational status | Full-time             | Ref.              |         | Ref.              |         | Ref.              |         | Ref.              |         |
|                     | Part-time             | 0.75 (0.42-1.31)  | 0.31    | 0.62 (0.36-1.07)  | 0.088   | 0.85 (0.49-1.49)  | 0.579   | 0.70 (0.52-0.95)* | 0.023   |
|                     | Self-employed         | 3.38 (1.60-7.12)* | 0.001   | 0.63 (0.36-1.11)  | 0.11    | 0.84 (0.52-1.35)  | 0.47    | 0.85 (0.62-1.18)  | 0.342   |

|                       |                                                |                    |        |                   |       |                   |       |                   |        |
|-----------------------|------------------------------------------------|--------------------|--------|-------------------|-------|-------------------|-------|-------------------|--------|
|                       | Student                                        | 0.92 (0.44-1.92)   | 0.832  | -                 |       | -                 |       | 0.59 (0.33-1.05)  | 0.072  |
|                       | Housewife/husband                              | 6.51 (1.01-41.86)* | 0.049  | 0.15 (0.02-1.44)  | 0.099 | 0.35 (0.04-3.23)  | 0.352 | 0.46 (0.14-1.53)  | 0.205  |
|                       | Unemployed                                     | 0.23 (0.10-0.52)*  | 0.001  | 0.49 (0.23-1.05)  | 0.068 | 0.62 (0.29-1.32)  | 0.215 | 0.50 (0.33-0.76)* | 0.001  |
| Income                | <100                                           | Ref.               |        | Ref.              |       | Ref.              |       | Ref.              |        |
| in ¥10,000s           | 100-299                                        | 2.02 (1.08-3.76)*  | 0.028  | 0.92 (0.46-1.84)  | 0.816 | 0.83 (0.43-1.58)  | 0.562 | 1.20 (0.83-1.74)  | 0.32   |
|                       | 300-499                                        | 3.33 (1.71-6.48)*  | <0.001 | 2.14 (1.03-4.45)* | 0.041 | 2.08 (1.07-4.04)* | 0.03  | 2.43 (1.66-3.57)* | <0.001 |
|                       | 500-799                                        | 2.35 (1.06-5.24)*  | 0.036  | 3.33 (1.52-7.29)* | 0.003 | 3.19 (1.61-6.34)* | 0.001 | 3.45 (2.28-5.20)* | <0.001 |
|                       | >800                                           | 0.96 (0.31-3.00)   | 0.939  | 3.16 (1.28-7.77)* | 0.012 | 2.67 (1.29-5.51)* | 0.008 | 2.75 (1.73-4.35)* | <0.001 |
| Education             | High school or less                            | Ref.               |        | Ref.              |       | Ref.              |       | Ref.              |        |
|                       | Trade/vocational school or short college       | 1.11 (0.67-1.84)   | 0.691  | 0.91 (0.58-1.43)  | 0.689 | 0.77 (0.51-1.16)  | 0.214 | 0.88 (0.67-1.14)  | 0.337  |
|                       | Undergraduate studies                          | 0.96 (0.66-1.41)   | 0.84   | 1.00 (0.71-1.41)  | 0.986 | 0.91 (0.64-1.29)  | 0.584 | 0.96 (0.78-1.17)  | 0.675  |
|                       | Graduate studies                               | 0.77 (0.40-1.49)   | 0.446  | 1.02 (0.56-1.85)  | 0.958 | 0.43 (0.26-0.70)* | 0.001 | 0.62 (0.44-0.85)* | 0.004  |
| Region of residence   | Hokkaido & Tohoku                              | Ref.               |        | Ref.              |       | Ref.              |       | Ref.              |        |
|                       | Kanto                                          | 0.91 (0.52-1.59)   | 0.734  | 0.55 (0.34-0.88)* | 0.012 | 1.02 (0.65-1.61)  | 0.928 | 0.83 (0.63-1.10)  | 0.197  |
|                       | Chubu                                          | 1.00 (0.54-1.83)   | 0.991  | 0.58 (0.35-0.96)* | 0.035 | 1.19 (0.72-1.99)  | 0.497 | 0.89 (0.65-1.22)  | 0.466  |
|                       | Kansai                                         | 0.79 (0.44-1.45)   | 0.449  | 0.69 (0.41-1.16)  | 0.162 | 1.05 (0.63-1.75)  | 0.842 | 0.87 (0.64-1.19)  | 0.385  |
|                       | Chugoku & Shikoku                              | 0.81 (0.39-1.68)   | 0.563  | 0.49 (0.25-0.94)* | 0.031 | 0.90 (0.49-1.65)  | 0.738 | 0.74 (0.50-1.10)  | 0.137  |
|                       | Kyushu & Okinawa                               | 1.03 (0.50-2.14)   | 0.932  | 0.81 (0.43-1.52)  | 0.511 | 1.90 (1.03-3.49)* | 0.04  | 1.25 (0.86-1.81)  | 0.243  |
| Urbanity of residence | Within Tokyo's 23 wards or prefectural capital | Ref.               |        | Ref.              |       | Ref.              |       | Ref.              |        |
|                       | In Tokyo but outside of the 23 wards           | 0.86 (0.38-1.96)   | 0.717  | 0.77 (0.41-1.44)  | 0.409 | 0.91 (0.46-1.78)  | 0.773 | 0.89 (0.60-1.32)  | 0.555  |

|                                             |                                                                     |                   |        |                   |       |                   |        |                   |        |
|---------------------------------------------|---------------------------------------------------------------------|-------------------|--------|-------------------|-------|-------------------|--------|-------------------|--------|
|                                             | Cities other than prefectural capitals (population >500,000)        | 1.10 (0.69-1.74)  | 0.687  | 0.83 (0.52-1.31)  | 0.421 | 0.95 (0.62-1.47)  | 0.827  | 0.98 (0.76-1.27)  | 0.885  |
|                                             | Cities other than prefectural capitals (population 300,000-499,999) | 1.13 (0.69-1.85)  | 0.64   | 1.04 (0.65-1.65)  | 0.882 | 1.34 (0.85-2.13)  | 0.209  | 1.14 (0.87-1.49)  | 0.329  |
|                                             | Cities other than prefectural capitals (population <300,000)        | 0.88 (0.58-1.33)  | 0.542  | 0.86 (0.59-1.24)  | 0.415 | 0.84 (0.60-1.17)  | 0.296  | 0.87 (0.70-1.08)  | 0.204  |
|                                             | Village or town                                                     | 1.25 (0.71-2.21)  | 0.438  | 0.94 (0.55-1.60)  | 0.822 | 1.08 (0.63-1.88)  | 0.772  | 1.05 (0.77-1.44)  | 0.753  |
| ANTHROPOMETRICS                             |                                                                     |                   |        |                   |       |                   |        |                   |        |
| Height                                      |                                                                     | 0.95 (0.91-0.99)* | 0.022  | 0.93 (0.84-1.04)  | 0.218 | 0.97 (0.93-1.02)  | 0.239  | 0.97 (0.94-1.00)* | 0.021  |
| Weight                                      |                                                                     | 1.04 (0.99-1.09)  | 0.103  | 1.11 (0.96-1.28)  | 0.172 | 1.02 (0.98-1.07)  | 0.242  | 1.03 (1.00-1.06)* | 0.024  |
| BMI                                         |                                                                     | 0.92 (0.81-1.04)  | 0.169  | 0.78 (0.51-1.19)  | 0.246 | 0.95 (0.86-1.06)  | 0.388  | 0.94 (0.87-1.01)  | 0.086  |
| How would you describe your attractiveness? | Above average                                                       | Ref.              |        | Ref.              |       | Ref.              |        | Ref.              |        |
|                                             | About average                                                       | 0.68 (0.42-1.11)  | 0.121  | 0.43 (0.24-0.75)* | 0.003 | 0.40 (0.23-0.71)* | 0.002  | 0.50 (0.37-0.67)* | <0.001 |
|                                             | Below average                                                       | 0.45 (0.26-0.79)* | 0.005  | 0.42 (0.23-0.76)* | 0.004 | 0.37 (0.20-0.67)* | 0.001  | 0.44 (0.32-0.60)* | <0.001 |
| ATTITUDES                                   |                                                                     |                   |        |                   |       |                   |        |                   |        |
| "I am satisfied with my sex life."          | Strongly agree                                                      | 2.27 (1.14-4.50)* | 0.019  | 1.35 (0.62-2.90)  | 0.45  | 0.44 (0.17-1.15)  | 0.093  | 1.06 (0.67-1.68)  | 0.81   |
|                                             | Agree                                                               | 1.51 (1.00-2.27)* | 0.048  | 1.26 (0.86-1.85)  | 0.23  | 1.13 (0.76-1.69)  | 0.55   | 1.21 (0.97-1.52)  | 0.094  |
|                                             | Neutral                                                             | Ref.              |        | Ref.              |       | Ref.              |        | Ref.              |        |
|                                             | Disagree                                                            | 1.47 (0.90-2.39)  | 0.125  | 1.24 (0.79-1.94)  | 0.35  | 0.83 (0.54-1.27)  | 0.381  | 1.05 (0.81-1.36)  | 0.717  |
|                                             | Strongly disagree                                                   | 0.96 (0.52-1.78)  | 0.906  | 1.43 (0.86-2.36)  | 0.167 | 0.71 (0.45-1.13)  | 0.145  | 0.95 (0.70-1.27)  | 0.707  |
| Would you like to change your               | Yes, I would like to increase it a lot                              | 3.41 (1.88-6.21)* | <0.001 | 1.58 (0.95-2.63)  | 0.079 | 2.58 (1.52-4.36)* | <0.001 | 2.22 (1.64-3.01)* | <0.001 |

|                                  |                                           |                   |       |                   |       |                   |        |                   |        |
|----------------------------------|-------------------------------------------|-------------------|-------|-------------------|-------|-------------------|--------|-------------------|--------|
| frequency of sexual intercourse? |                                           |                   |       |                   |       |                   |        |                   |        |
|                                  | Yes, I would like to increase it a little | 1.75 (1.18-2.59)* | 0.006 | 1.02 (0.71-1.47)  | 0.913 | 1.96 (1.34-2.85)* | <0.001 | 1.52 (1.22-1.89)* | <0.001 |
|                                  | No                                        | Ref.              |       | Ref.              |       | Ref.              |        | Ref.              |        |
|                                  | Yes, I would like to decrease It a little | 1.07 (0.43-2.67)  | 0.89  | 1.77 (0.56-5.59)  | 0.332 | 1.28 (0.39-4.15)  | 0.682  | 1.47 (0.81-2.69)  | 0.207  |
|                                  | Yes, I would like to decrease it a lot    | 1.45 (0.56-3.72)  | 0.444 | 0.29 (0.11-0.77)* | 0.014 | 0.88 (0.33-2.35)  | 0.798  | 0.68 (0.39-1.20)  | 0.18   |
| How important is sex to you?     | Very important                            | 1.39 (0.78-2.48)  | 0.259 | 1.64 (0.97-2.78)  | 0.063 | 1.48 (0.91-2.41)  | 0.112  | 1.59 (1.18-2.13)* | 0.002  |
|                                  | Somewhat important                        | 1.68 (1.10-2.56)* | 0.016 | 1.37 (0.95-1.98)  | 0.096 | 1.47 (1.03-2.09)* | 0.032  | 1.51 (1.22-1.88)* | <0.001 |
|                                  | Neither important nor unimportant         | Ref.              |       | Ref.              |       | Ref.              |        | Ref.              |        |
|                                  | Not very important                        | 1.32 (0.71-2.44)  | 0.379 | 1.02 (0.60-1.72)  | 0.951 | 0.70 (0.44-1.13)  | 0.147  | 0.92 (0.68-1.26)  | 0.607  |
|                                  | Not important at all                      | 0.39 (0.16-0.95)* | 0.037 | 0.46 (0.22-0.94)* | 0.034 | 1.40 (0.72-2.71)  | 0.324  | 0.70 (0.47-1.06)  | 0.095  |

\* p&lt;0.05

- unable to calculate



**STable 4.** Distribution of the number of estimated CSW partners over the lifetime reported by male NInJaS respondents aged 20-49 years.

| Number of partners | Frequency | Number of partners | Frequency | Number of partners | Frequency |
|--------------------|-----------|--------------------|-----------|--------------------|-----------|
| 0                  | 2,911     | 29                 | 6         | 95                 | 5         |
| 1                  | 150       | 30                 | 16        | 96                 | 2         |
| 2                  | 125       | 34                 | 2         | 97                 | 2         |
| 3                  | 83        | 35                 | 3         | 98                 | 2         |
| 4                  | 61        | 37                 | 2         | 99                 | 1         |
| 5                  | 134       | 39                 | 1         | 100 or more        | 40        |
| 6                  | 18        | 40                 | 13        |                    |           |
| 7                  | 42        | 42                 | 2         |                    |           |
| 8                  | 31        | 44                 | 2         |                    |           |
| 9                  | 27        | 45                 | 12        |                    |           |
| 10                 | 83        | 46                 | 2         |                    |           |
| 11                 | 11        | 47                 | 6         |                    |           |
| 12                 | 18        | 48                 | 3         |                    |           |
| 13                 | 13        | 49                 | 2         |                    |           |
| 14                 | 6         | 50                 | 7         |                    |           |
| 15                 | 25        | 51                 | 1         |                    |           |
| 16                 | 5         | 55                 | 2         |                    |           |
| 17                 | 18        | 59                 | 1         |                    |           |
| 18                 | 8         | 60                 | 2         |                    |           |
| 19                 | 8         | 65                 | 1         |                    |           |
| 20                 | 33        | 68                 | 1         |                    |           |
| 21                 | 3         | 70                 | 1         |                    |           |
| 22                 | 4         | 74                 | 1         |                    |           |
| 23                 | 1         | 80                 | 1         |                    |           |
| 24                 | 3         | 85                 | 2         |                    |           |
| 25                 | 12        | 86                 | 1         |                    |           |
| 26                 | 3         | 88                 | 1         |                    |           |
| 27                 | 6         | 90                 | 3         |                    |           |
| 28                 | 8         | 92                 | 1         |                    |           |

**Table 5.** Sociodemographic, anthropometric, and attitudinal characteristics of male NInJaS respondents aged 20-49 years, stratified by use of sexual services in the past year<sup>a</sup>.

| Variable            | Category              | Use of CSW Services in the Past Year |               |            |
|---------------------|-----------------------|--------------------------------------|---------------|------------|
|                     |                       | No (N = 3659)                        | Yes (N = 341) | Total      |
| SOCIODEMOGRAPHICS   |                       |                                      |               |            |
| Age                 | Mean (SD)             | 36.4 (8.7)                           | 36.5 (7.9)    | 36.4 (8.6) |
| Marital status      | Married               | 53.2                                 | 55.5          | 53.3       |
|                     | Never married         | 42.2                                 | 38.5          | 41.9       |
|                     | Previously married    | 4.7                                  | 6.0           | 4.8        |
| Relationship status | Married               | 53.2                                 | 55.5          | 53.3       |
|                     | Cohabiting            | 2.1                                  | 5.1           | 2.3        |
|                     | In a relationship     | 7.7                                  | 7.8           | 7.7        |
|                     | Not in a relationship | 37.1                                 | 31.6          | 36.8       |
| Sexual orientation  | Heterosexual          | 85.3                                 | 83.5          | 85.2       |
|                     | Bisexual              | 4.2                                  | 7.7           | 4.4        |
|                     | Homosexual            | 1.4                                  | 1.8           | 1.4        |
|                     | Asexual               | 8.6                                  | 6.4           | 8.5        |
|                     | Other                 | 0.5                                  | 0.6           | 0.5        |
| Occupational status | Full-time             | 53.0                                 | 75.3          | 54.2       |
|                     | Part-time             | 16.6                                 | 9.7           | 16.2       |
|                     | Self-employed         | 5.1                                  | 5.8           | 5.2        |
|                     | Student               | 5.0                                  | 2.1           | 4.9        |
|                     | Housewife/husband     | 12.2                                 | 4.7           | 11.7       |
|                     | Unemployed            | 8.1                                  | 2.4           | 7.8        |
| Income              | <100                  | 30.1                                 | 10.5          | 29.0       |

|                        |                                                                     |             |             |             |
|------------------------|---------------------------------------------------------------------|-------------|-------------|-------------|
| in ¥10,000s            | 100-299                                                             | 24.5        | 18.8        | 24.1        |
|                        | 300-499                                                             | 23.9        | 33.1        | 24.4        |
|                        | 500-799                                                             | 15.2        | 27.9        | 15.9        |
|                        | >800                                                                | 6.4         | 9.7         | 6.6         |
| Education              | High school or less                                                 | 28.4        | 27.2        | 28.3        |
|                        | Trade/vocational school or short college                            | 22.2        | 15.2        | 21.8        |
|                        | Undergraduate studies                                               | 44.1        | 49.4        | 44.4        |
|                        | Graduate studies                                                    | 5.3         | 8.2         | 5.5         |
| Region of residence    | Hokkaido & Tohoku                                                   | 10.5        | 9.2         | 10.5        |
|                        | Kanto                                                               | 36.1        | 40.0        | 36.3        |
|                        | Chubu                                                               | 16.8        | 16.3        | 16.8        |
|                        | Kansai                                                              | 17.4        | 17.4        | 17.4        |
|                        | Chugoku & Shikoku                                                   | 8.4         | 5.7         | 8.2         |
|                        | Kyushu & Okinawa                                                    | 10.8        | 11.5        | 10.8        |
| Urbanity of residence  | Within Tokyo's 23 wards or prefectural capital                      | 30.8        | 30.9        | 30.9        |
|                        | In Tokyo but outside of the 23 wards                                | 4.3         | 5.4         | 4.3         |
|                        | Cities other than prefectural capitals (population >500,000)        | 14.0        | 15.7        | 14.1        |
|                        | Cities other than prefectural capitals (population 300,000-499,999) | 12.9        | 11.8        | 12.8        |
|                        | Cities other than prefectural capitals (population <300,000)        | 27.7        | 25.1        | 27.5        |
|                        | Village or town                                                     | 10.3        | 11.1        | 10.3        |
| <b>ANTHROPOMETRICS</b> |                                                                     |             |             |             |
| Height                 | Mean (SD)                                                           | 164.3 (9.1) | 168.2 (8.6) | 164.5 (9.1) |
| Weight                 | Mean (SD)                                                           | 58.8 (13.2) | 64.7 (14.3) | 59.2 (13.3) |

|                                                                |                                           |            |            |            |
|----------------------------------------------------------------|-------------------------------------------|------------|------------|------------|
| BMI                                                            | Mean (SD)                                 | 21.7 (4.1) | 22.7 (4.2) | 21.7 (4.1) |
| How would you describe your attractiveness?                    | Above average                             | 8.9        | 11.2       | 9.0        |
|                                                                | About average                             | 55.9       | 58.2       | 56.0       |
|                                                                | Below average                             | 35.2       | 30.7       | 35.0       |
| <i>ATTITUDES</i>                                               |                                           |            |            |            |
| "I am satisfied with my sex life."                             | Strongly agree                            | 5.8        | 5.0        | 5.8        |
|                                                                | Agree                                     | 19.7       | 19.6       | 19.7       |
|                                                                | Neutral                                   | 52.6       | 45.7       | 52.2       |
|                                                                | Disagree                                  | 12.3       | 17.4       | 12.6       |
|                                                                | Strongly disagree                         | 9.7        | 12.4       | 9.8        |
| Would you like to change your frequency of sexual intercourse? | Yes, I would like to increase it a lot    | 10.9       | 24.9       | 11.7       |
|                                                                | Yes, I would like to increase it a little | 24.1       | 31.6       | 24.6       |
|                                                                | No                                        | 55.4       | 34.4       | 54.2       |
|                                                                | Yes, I would like to decrease It a little | 2.9        | 2.9        | 2.9        |
|                                                                | Yes, I would like to decrease it a lot    | 6.7        | 6.2        | 6.7        |
| Importance                                                     | Very important                            | 12.8       | 29.0       | 13.7       |
|                                                                | Somewhat important                        | 31.9       | 36.5       | 32.2       |
|                                                                | Neither important nor unimportant         | 29.7       | 22.4       | 29.3       |
|                                                                | Not very important                        | 13.3       | 5.3        | 12.9       |
|                                                                | Not important at all                      | 12.4       | 6.8        | 12.1       |

ª The following two questions were included In the NiJaS survey: (1) How many sexual partners have you had in the last year, including CSWs? (2) How many sexual partners have you had in the last year, excluding CSWs? Use of CSW services in the past year was defined by taking the difference between these two answers and obtaining a value of 1 or greater.

## References

1. Ghaznavi C, Sakamoto H, Nomura S, et al. Fish in the sea: Number, characteristics, and partner preferences of unmarried Japanese adults - analysis of a national survey. *PLoS One*. 2022;17(2):e0262528. doi:10.1371/journal.pone.0262528
2. Yamamura E, Tsutsui Y. Comparing the role of the height of men and women in the marriage market. *Econ Hum Biol*. Aug 2017;26:42-50. doi:10.1016/j.ehb.2017.02.006
3. Furugori T. The Effects of Body Weight on Employment and Marriage in Japan. presented at: 71st International Atlantic Economic Conference; 2011; Athens, Greece.
4. Rhodes G, Simmons LW, Peters M. Attractiveness and sexual behavior: Does attractiveness enhance mating success? *Evolution and Human Behavior*. 2005;26(2):186-201. doi:<https://doi.org/10.1016/j.evolhumbehav.2004.08.014>
5. Weeden J, Sabini J. Subjective and objective measures of attractiveness and their relation to sexual behavior and sexual attitudes in university students. *Arch Sex Behav*. Feb 2007;36(1):79-88. doi:10.1007/s10508-006-9075-x
